# Supplementary material
Source: Springer Nature journal article supplement (https://www.springermedizin.de/resource/supplementary/12943_2013_1482_MOESM13_ESM.pdf/9553114)

**A**

NODES IN  
HEALTHY MUCOSA  
NETWORK

NODES IN  
ADJACENT MUCOSA  
NETWORK

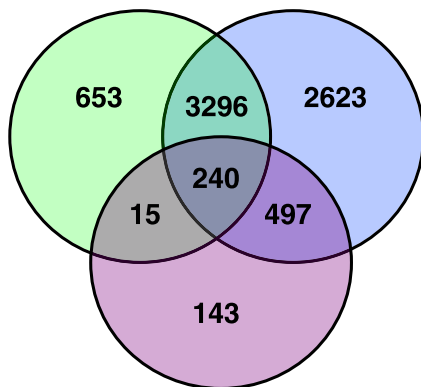

DEG BETWEEN  
ADJACENT AND  
HEALTHY MUCOSA

ADJACENT MUCOSA

HEALTHY MUCOSA

**B**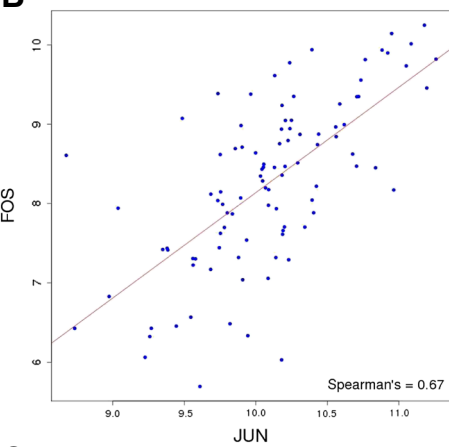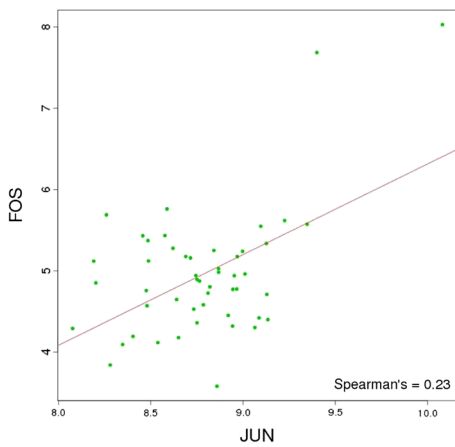**C**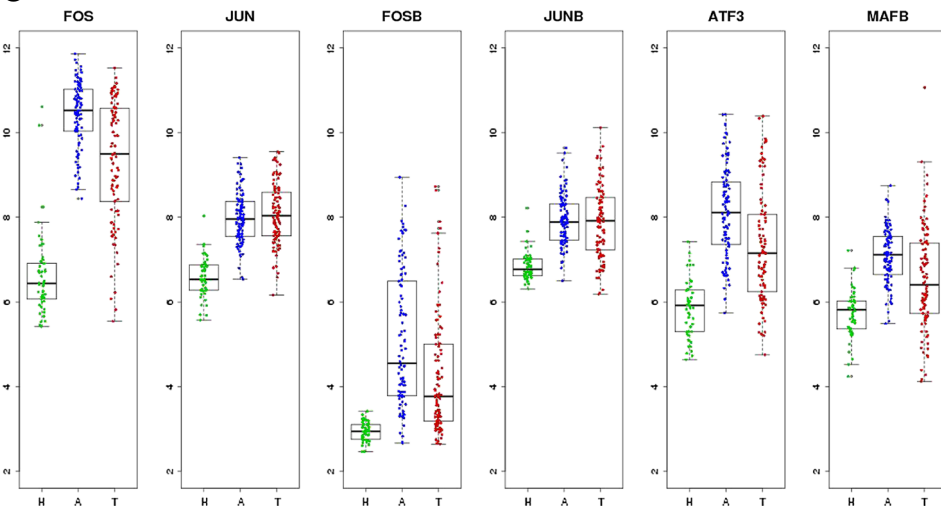

Supplement: MOESM13 [file 9553114]
